# Supplementary material for: The StartReact Effect on Self-Initiated Movements
Source: Hindawi journal article supplement (doi:10.1155/2013/471792), 2013-01-01
Supplement: f1 [file 471792.f1.pdf]

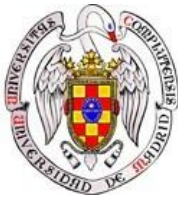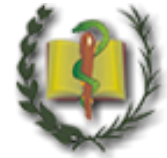

**PHYSICAL MEDICINE AND REHABILITATION DEPARTMENT  
FACULTY OF MEDICINE  
UNIVERSIDAD COMPLUTENSE DE MADRID**

C/Ciudad Universitaria s/n  
28040 Madrid  
Spain

E-mail: [jmcastel@med.ucm.es](mailto:jmcastel@med.ucm.es)

16 July 2013

Study Title: **The StartReact effect on self-initiated movements**  
Ref: **2738/471792.v1**

Dear Editor in Chief,

Thank you for your letter regarding the article of reference submitted for evaluation for publication in BioMed Research International. We have carefully read the comments of the reviewers, and decided to provide the following answers. We have modified all sections of the manuscript according to the suggestions, as shown in the attached version.

We hope that the changes made in the manuscript satisfy the concerns of the reviewers and the article is now acceptable for publication.

Yours sincerely,

Juan M Castellote
